# Supplementary material for: Citric Acid Capped CdS Quantum Dots for Fluorescence Detection of Copper Ions (II) in Aqueous Solution
Source: PubMed Central journal article supplement (PMC6358774; doi:10.3390/nano9010032), 2018-12-27
Supplement: nanomaterials-09-00032-s001.pdf [file nanomaterials-09-00032-s001.pdf]

# Supplementary Materials

Table S1. Chemical reagent used in the experiment.

| Chemical Formula                                               | Purity  | Producer                                                | Country |
|----------------------------------------------------------------|---------|---------------------------------------------------------|---------|
| CdCl <sub>2</sub> ·2½H <sub>2</sub> O                          | AR      | Chengdu Kelon Chemical Reagent Factory                  | China   |
| C <sub>2</sub> H <sub>5</sub> NS                               | AR      | Tianjin Zhiyuan Chemical Reagent Co. Ltd.               | China   |
| NaOH                                                           | AR      | Aladdin                                                 | China   |
| C <sub>6</sub> H <sub>8</sub> O <sub>7</sub> ·H <sub>2</sub> O | AR      | Tianjin Zhiyuan Chemical Reagent Co. Ltd.               | China   |
| Tris                                                           | AR      | Macklin                                                 | China   |
| HCl                                                            | AR      | Chengdu Kelon Chemical Reagent Factory                  | China   |
| FeCl <sub>2</sub> ·4H <sub>2</sub> O                           | AR      | Tianjin Zhiyuan Chemical Reagent Co. Ltd.               | China   |
| FeCl <sub>3</sub> ·6H <sub>2</sub> O                           | 99.000% | Tianjin Fuchen Chemicals Reagent Factory                | China   |
| KCl                                                            | AR      | Molbase                                                 | China   |
| LaCl <sub>3</sub>                                              | AR      | Tianjin Kemiou Chemical Reagent co., LTD                | China   |
| Mg(NO <sub>3</sub> ) <sub>2</sub> ·H <sub>2</sub> O            | AR      | Tianjin Zhiyuan Chemical Reagent Co. Ltd.               | China   |
| MnCl <sub>2</sub> ·4H <sub>2</sub> O                           | 99.0%   | Tianjin Fuchen Chemicals Reagent Factory                | China   |
| NaCl                                                           | AR      | Beijing Chemical Factory                                | China   |
| NiCl <sub>2</sub> ·6H <sub>2</sub> O                           | 98.000% | Beijing Found Stat Science & Thechnology co., LTD       | China   |
| Pb(NO <sub>3</sub> ) <sub>2</sub>                              | AR      | Tianjin Zhiyuan Chemical Reagent Co. Ltd.               | China   |
| ZnCl <sub>2</sub>                                              | 98.0%   | Tianjin Fengchuan Chemical Reagent Technologes Co. Ltd. | China   |
| AlCl <sub>3</sub> ·6H <sub>2</sub> O                           | AR      | Tianjin Fengchuan Chemical Reagent Technologes Co. Ltd. | China   |
| BaCl <sub>2</sub> ·2H <sub>2</sub> O                           | AR      | Chengdu Kelon Chemical Reagent Factory                  | China   |
| CaCl <sub>2</sub>                                              | 96.00%  | Tianjin Fengchuan Chemical Reagent Technologes Co. Ltd. | China   |
| CoCl <sub>2</sub> ·6H <sub>2</sub> O                           | 99.000% | Tianjin Fengchuan Chemical Reagent Technologes Co. Ltd. | China   |
| CrCl <sub>3</sub> ·6H <sub>2</sub> O                           | AR      | Tianjin Guangfu Fine Chemical Research Institute        | China   |
| CuCl <sub>2</sub> ·2H <sub>2</sub> O                           | 99.0%   | Tianjin Fengchuan Chemical Reagent Technologes Co. Ltd  | China   |

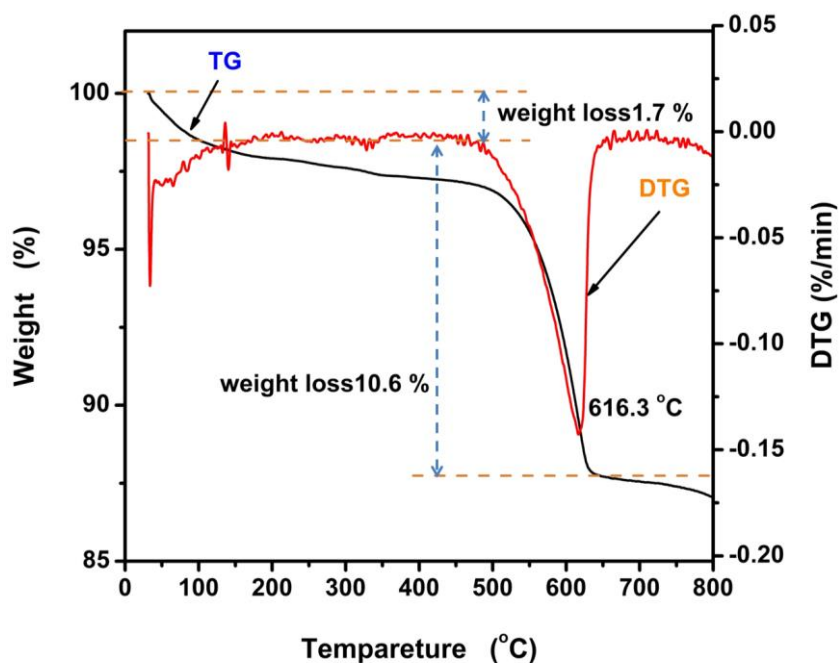

Figure S1. TGA and DTG curves of as-synthesized CA-CdS QDs.

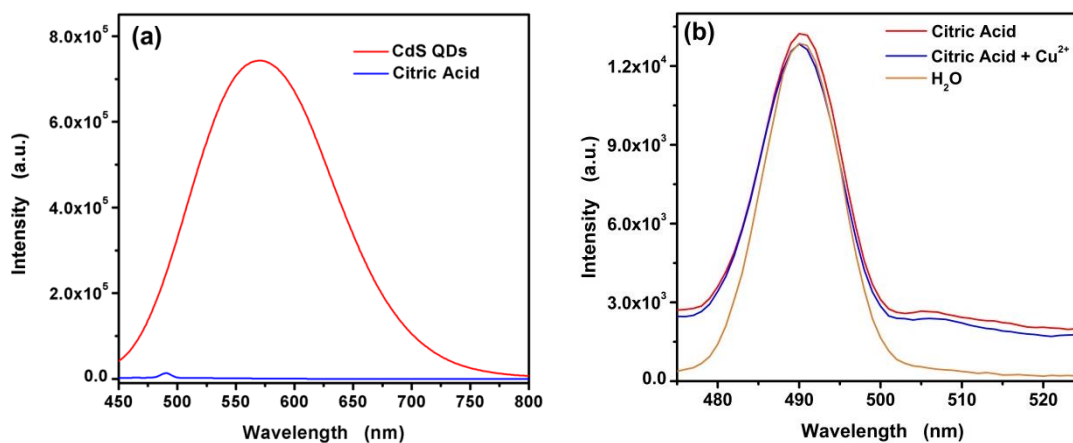

Figure S2. (a) Fluorescence spectra of CdS QDs (red line) and citric acid solution (blue line). (b) Fluorescence spectra of H<sub>2</sub>O (khaki line), citric acid solution in the absence (red line) and in the presence (blue line) of Cu<sup>2+</sup>.

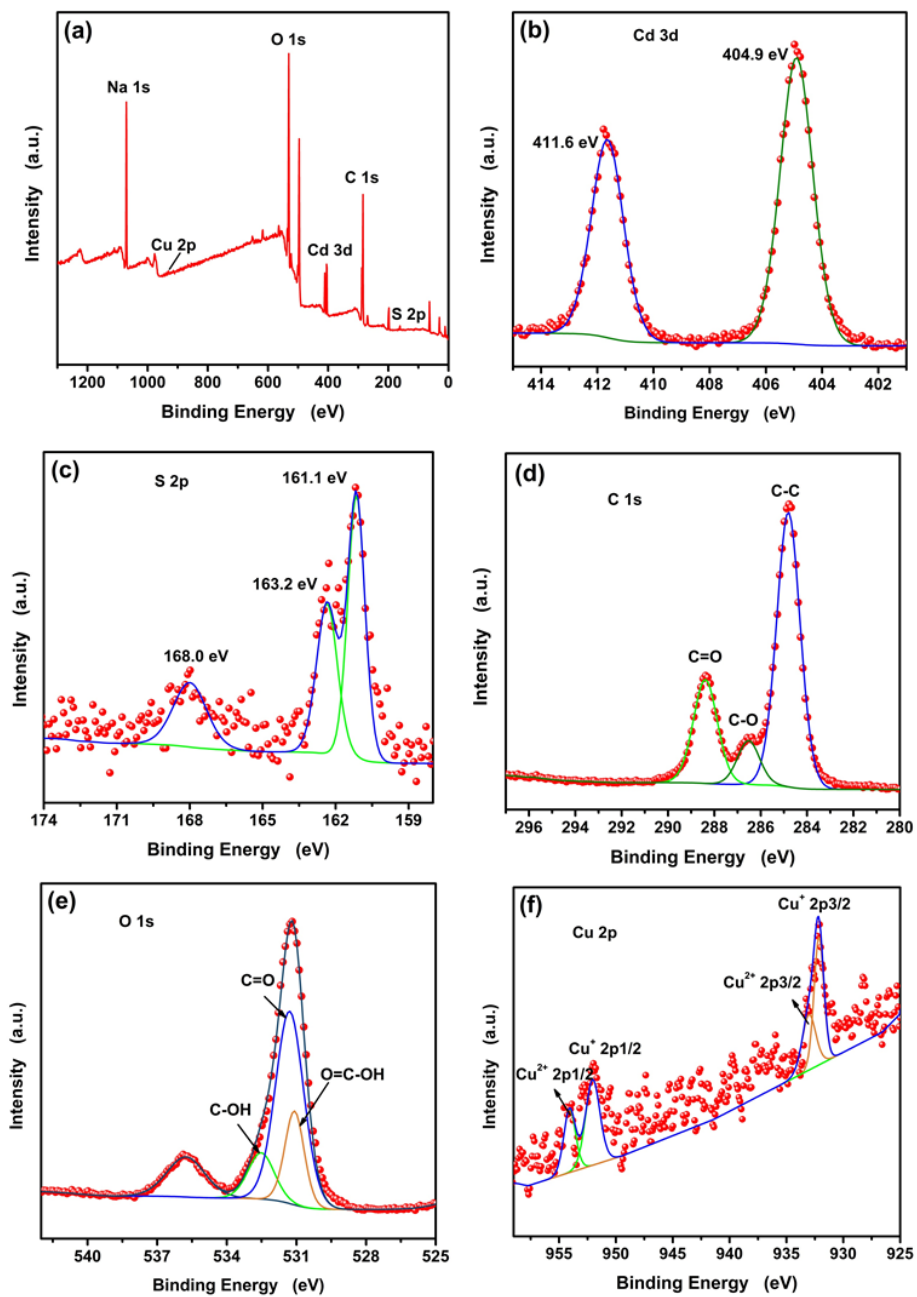

**Figure S3.** The (a) survey, (b) Cd 3d, (c) S 2p, (d) C 1s, (e) O 1s and (f) Cu 2p XPS spectra for the CA-CdS QDs after interaction with  $\text{Cu}^{2+}$ .
